# Supplementary material for: Resistance to cardiomyocyte hypertrophy in ae3 −/− mice, deficient in the AE3 Cl−/HCO3− exchanger
Source: PubMed Central journal article supplement (PMC4120010; doi:10.1186/1471-2261-14-89), 2014-07-21
Supplement: 1471-2261-14-89-S3.pdf [file 1471-2261-14-89-S3.pdf]

**A**

kDa

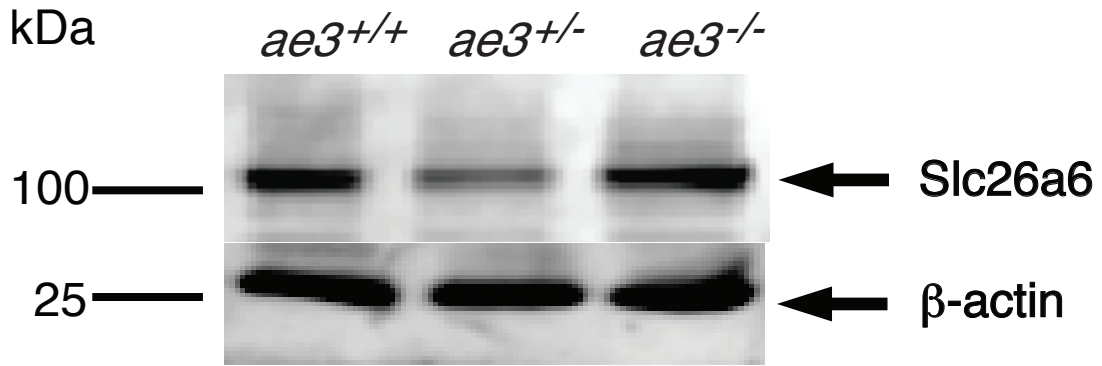**B**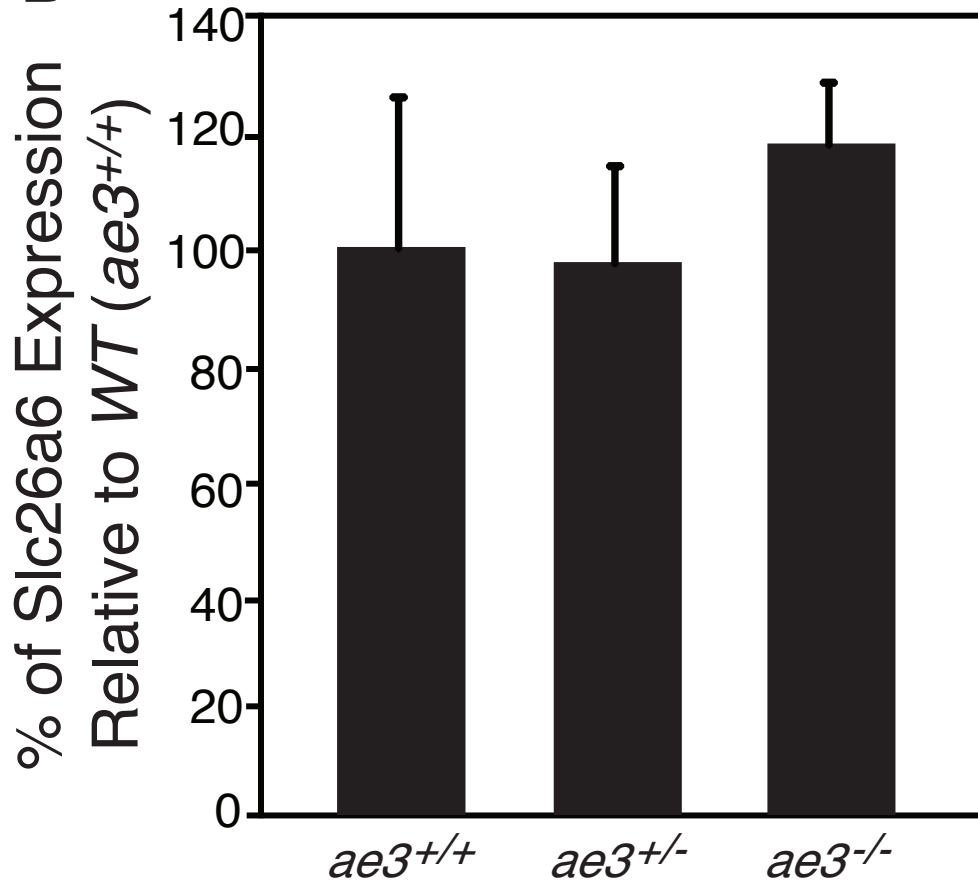

Supplementary Figure 3
